## RETRACTION

# Retraction: Moringa leaf extract improves biochemical attributes, yield and grain quality of rice (*Oryza sativa* L.) under drought stress

The *PLOS ONE* Editors

The *PLOS ONE* Editors retract this article [1] because it was identified as one of a series of submissions for which we have concerns about authorship, competing interests, and peer review. We regret that the issues were not addressed prior to the article's publication.

MBH, MMM, SI, and ZH either did not respond directly or could not be reached. SafdarB responded but expressed neither agreement nor disagreement with the editorial decision. AB, AMES, BSA, MSS, SaqibB, SK, and YL did not agree with the retraction.

## Reference

1. Khan S, Basit A, Hafeez MB, Irshad S, Bashir S, Bashir S, et al. (2021) Moringa leaf extract improves biochemical attributes, yield and grain quality of rice (*Oryza sativa* L.) under drought stress. *PLoS ONE* 16(7): e0254452. <https://doi.org/10.1371/journal.pone.0254452> PMID: 34270569

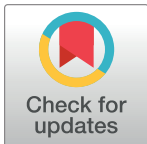

## OPEN ACCESS

**Citation:** The *PLOS ONE* Editors (2022) Retraction: Moringa leaf extract improves biochemical attributes, yield and grain quality of rice (*Oryza sativa* L.) under drought stress. *PLoS ONE* 17(8): e0272182. <https://doi.org/10.1371/journal.pone.0272182>

**Published:** August 3, 2022

**Copyright:** © 2022 The *PLOS ONE* Editors. This is an open access article distributed under the terms of the [Creative Commons Attribution License](https://creativecommons.org/licenses/by/4.0/), which permits unrestricted use, distribution, and reproduction in any medium, provided the original author and source are credited.
